# Supplementary material for: Long-term alfalfa planting mediates the coupling of soil water and organic carbon storage in a semi-arid area of the Loess Plateau, China
Source: PeerJ. 2024 Nov 5;12:e18373. doi: 10.7717/peerj.18373 (PMC11546141; doi:10.7717/peerj.18373)
Supplement: Data S1 [file peerj-12-18373-s005.xlsx]

## Sheet: Soil BD
	1	5	7	10	15	20	30	NG
0-20	2.46	2.51	2.26	2.2	2.11	2. 09	1.94	2. 13
0-20	2.2	2.32	2.22	2.26	2.08	2.1	1.89	2.08
0-20	2.55	2.43	2.24	2.19	2.03	2.15	1.91	2.17
20-40	2.41	2. 11	2.21	2.33	2.02	2. 15	1.95	2.24
20-40	2.38	2.02	2.23	2.61	2.11	2. 09	1.98	2.26
20-40	2.39	2.2	2.19	2.5	2.01	2. 10	1.97	2.19
40-60	2.28	2. 10	2. 17	2.5	2. 11	2. 10	2.01	2. 17
40-60	2.2	2. 14	2. 08	2.39	2. 14	2. 18	2.06	2. 09
40-60	2.19	2. 12	2. 20	2.58	2. 01	2. 12	2.11	2. 12
60-80	2.25	2.08	2.24	2.21	1.98	2.1	2.02	2
60-80	2.1	2.05	2.18	2.35	2.05	2.22	1.98	2.05
60-80	2.08	2.13	2.14	2.2	2.12	2.24	2.05	2.12
80-100	2.01	2	2.02	2.14	1.95	2.02	2.11	2.14
80-100	2.15	2.15	2.14	2.09	2.31	2.45	2.21	2.05
80-100	2.22	2.04	2	2.21	2.14	2.22	2.2	2.14

## Sheet: SW
	1	5	7	10	15	20	30	NG
0-20	13.97	16.78	14.95	16.18	14.12	15.66	18.03	11.82
0-20	14.05	16.43	14.88	16.9	14.08	15.6	18.11	11.44
0-20	13.84	15.97	15.03	17.02	13.98	15.51	17.85	11.49
20-40	13	15.17	14.53	16.16	10.94	15.2	13.67	14.36
20-40	13.03	15	14.6	16.25	10.87	14.96	13.5	14.3
20-40	12.93	14.83	14.46	15.96	11.06	15.26	14.02	13.99
40-60	15.87	14.45	13.32	13.95	5.82	13.85	10.3	16.1
40-60	15.02	14.74	13.4	13.83	5.77	14	10.21	16.11
40-60	16.07	14.6	13.36	14.13	6.1	14.05	10.45	16.32
60-80	20.16	15.05	10.22	14.86	4.06	14.12	8.02	15.63
60-80	20.62	14.82	10.1	14.66	3.82	14.65	7.08	15.57
60-80	20.5	15.02	10.16	14.64	4.55	14.5	8	15.15
80-100	19.54	15.33	9.66	14.73	2.76	14.8	9.11	16.48
80-100	19.62	15.37	9.45	14.54	3.01	14.76	9.31	16.66
80-100	19.57	15.74	9.5	15.1	2.46	14.8	8.89	16.6

## Sheet: SOC
	1	5	7	10	15	20	30	NG
0-20	23.5	25.58	24.29	26.52	27.78	20.17	18.39	16.58
0-20	23.15	25.21	24.38	26.12	27.87	20.18	18.45	15.83
0-20	23.27	25.01	23.98	27.05	27.12	19.98	18.18	16.03
20-40	18.25	23.08	17.48	20.35	23.61	17.95	18.17	11.03
20-40	18.2	23.24	17.6	19.69	23.58	18.03	18.26	11.08
20-40	17.89	23.36	17	20.14	23.44	17.93	18.08	10.85
40-60	16.83	19.5	16.35	17.24	17.93	13.66	10.78	13.8
40-60	16.45	19.12	16.08	16.87	17.39	14.08	11.12	12.59
40-60	17.13	20.08	16.12	17.24	17.48	13.45	10.29	13.79
60-80	20.58	20.5	17.38	17.58	17.28	13.2	13.48	13.96
60-80	20.25	20.42	17.25	17.35	17.39	13.27	13.51	14.08
60-80	20.3	20.15	17.19	17.69	17.58	12.98	13.04	13.49
80-100	15.2	18.12	17.35	17.39	15.19	14.48	16.58	16.89
80-100	15.01	18.08	17.39	17.58	16.06	14.58	16.2	17.11
80-100	14.23	17.91	17.84	17.24	15.86	14.34	16.98	16.28
